# Supplementary material for: Photoresponse enhancement by mixing of an alcohol-soluble C60 derivative into a ruthenium complex monolayer
Source: Royal Society of Chemistry journal article supplement (doi:10.1039/c3cp52373j), 2013-01-01
Supplement: c3cp52373j.pdf [file c3cp52373j.pdf]

Supplementary Information for “**Photoresponse  
Enhancement by Mixing of an Alcohol-Soluble C<sub>60</sub>  
Derivative into a Ruthenium Complex Monolayer**”

Kei-ichi Terada<sup>a§</sup>, Makiko Oyama<sup>a</sup>, Katsuhiko Kanaizuka<sup>b,c</sup>,

Masa-aki Haga<sup>c</sup>, and Takao Ishida<sup>\*a</sup>

<sup>a</sup>*Nanosystem Research Institute(NRI), National Institute of Advanced Industrial Science  
and Technology (AIST), 1-2-1 Namiki, Tsukuba, Ibaraki 305-8564, Japan,*

*E-mail: [t-ishida@aist.go.jp](mailto:t-ishida@aist.go.jp)*

<sup>b</sup>*Department of Material and Biological Chemistry, Faculty of Science, Yamagata  
University, 1-4-12 Kozirakawa-machi, Yamagata 990-8560, Japan.*

<sup>c</sup>*Department of Applied Chemistry, Faculty of Science and Engineering,  
Chuo University, 1-13-27 Kasuga, Bunkyo-ku, Tokyo 112-8551, Japan.*

<sup>§</sup>*Present address: KST World Corp., Fukui, Japan.*

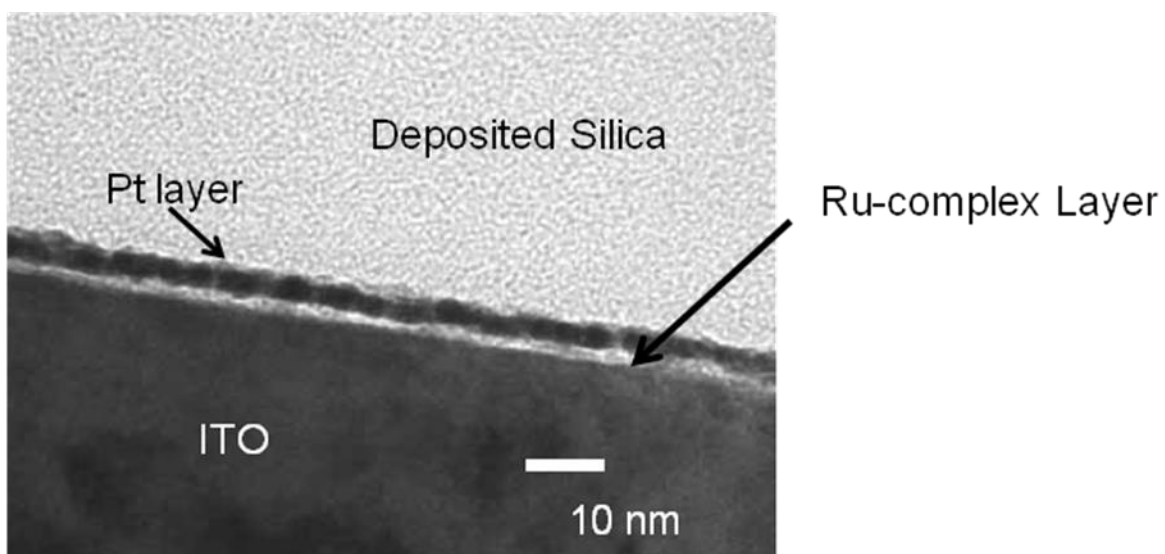

**Figure S1** A cross-sectional TEM image of the Ru complex layer. The TEM image was taken at an electron acceleration energy of 300 keV using a Hitachi U-9000 electron microscope. The Ru complex layer was coated with a Pt and silica layer to reduce damage during the milling process. The thickness of the mixed layer was estimated to be 2.5 nm.

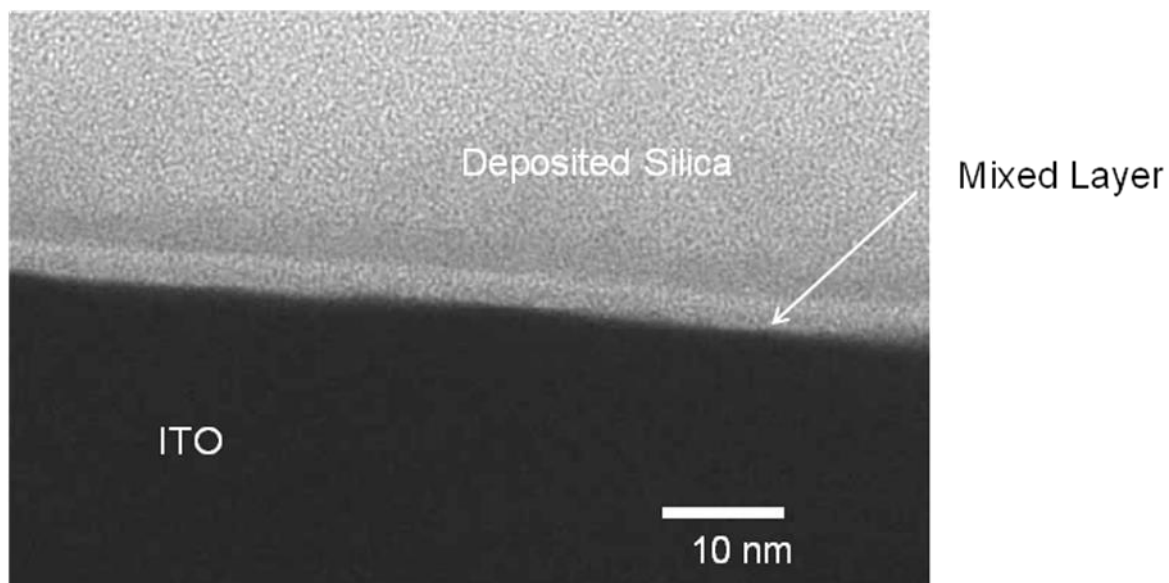

**Figure S2** Cross-sectional TEM image of the mixed monolayer. The TEM image was also taken at an electron acceleration energy of 300 keV using a Hitachi U-9000 electron microscope. The Ru complex layer was coated with a silica layer to reduce damage during the milling process. The mixed layer appears amorphous in this image. Cf-C<sub>60</sub> and Ru complexes cannot be distinguished. The thickness of the mixed layer was estimated to be 4.7 nm

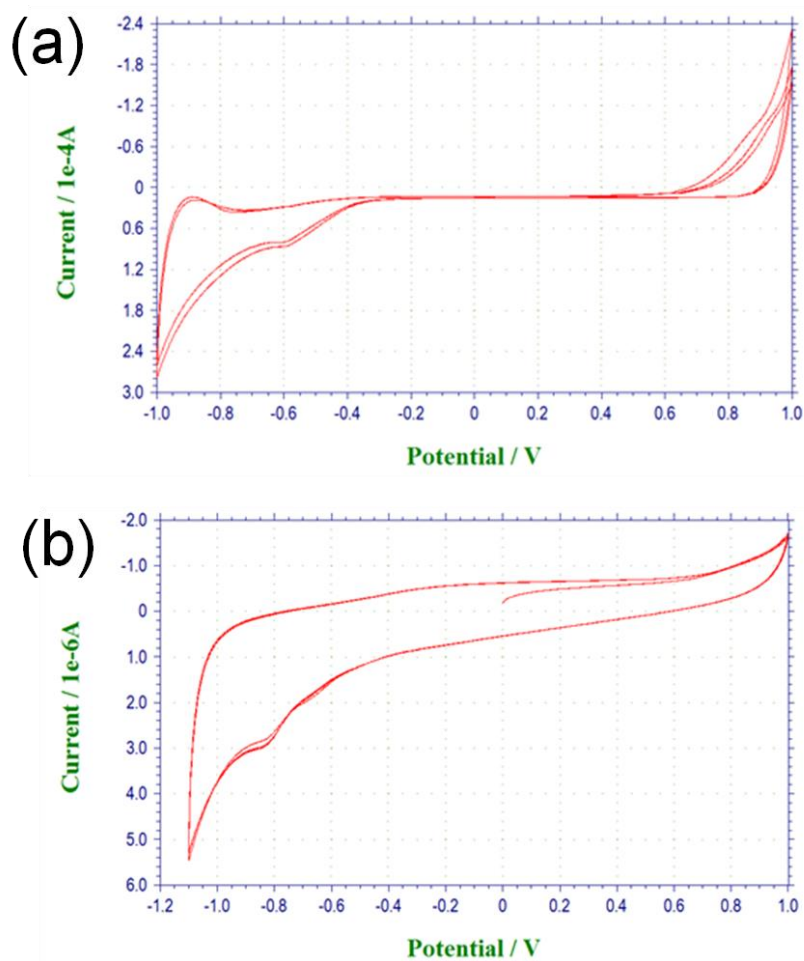

**Figure S3** Cyclic voltammograms of (a) Cf-C<sub>60</sub> film cast on an ITO substrate and (b) Cf-C<sub>60</sub> in a liquid. The measurements were performed at 25 °C in aqueous 0.1 M Na<sub>2</sub>SO<sub>4</sub> solution. The peak attributed to Cf-C<sub>60</sub> was observed at (a) -0.62 V and (b) -0.8V.

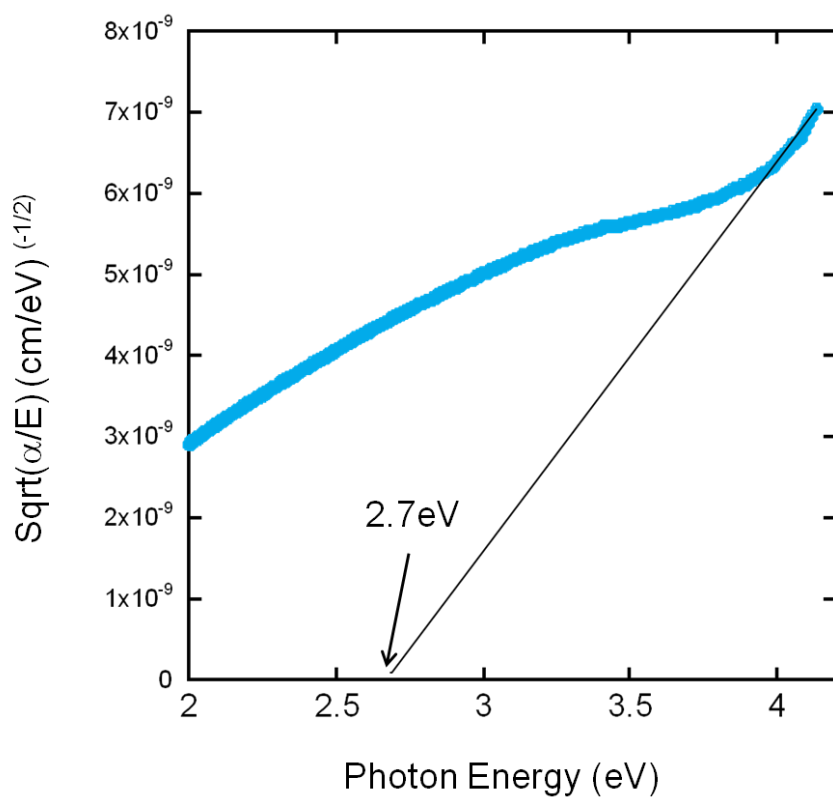

**Figure S4** Tauc plots of the cast Cf-C<sub>60</sub> film. The band gap of Cf-C<sub>60</sub> was estimated as 2.7 eV by using a previously published method.<sup>39</sup>
